# Supplementary material
Source: publisher figshare collection journal article supplement (https://acs.figshare.com/ndownloader/files/24624597)
Supplement: Supplementary file 1 [file 24624597]

# Thermally-Degradable Thermoset Adhesive Based on a Cellulose Nanocrystals / Epoxy Nanocomposite

*Jung-Soo Kang, Andrew J. Myles, Kenneth D. Harris\**

Nanotechnology Research Centre, National Research Council of Canada, 11421

Saskatchewan Drive, Edmonton, Alberta, Canada, T6G 2M9

\* [kenneth.harris@nrc-cnrc.gc.ca](mailto:kenneth.harris@nrc-cnrc.gc.ca)

## Experimental Section

### Materials and Methods

Poly[(phenyl glycidyl ether)-co-formaldehyde] with average  $M_n \sim 345$  g/mol (BisF, Sigma-Aldrich), tetraethylenepentamine (Sigma-Aldrich), and cellulose nanocrystals (CNCs, Alberta-Pacific Forest Industries Inc.) were used as received. BisF/CNC nanocomposites were fabricated using a planetary mixer/deaerator (Kurabo Mazerustar, KK-250S). For better uniformity of mixing, BisF was warmed to 60 °C to reduce viscosity. The surface of metal specimens was cleaned using soap and gently sanded with a belt sander equipped with a P1000 sanding belt. After sanding, specimens were cleaned using isopropyl alcohol. BisF resin and hardener were mixed with a 5:1 weight ratio, and specimens were prepared using the method described in ASTM standard D1002 ("Standard test method for apparent shear strength of single-lap-joint adhesively bonded metal specimens by tension loading (metal-to-metal)"). The curing process was performed at 100 °C for 1.5 hours for both pristine BisF and BisF/CNC nanocomposites.

### Characterization

For shear strength measurement, a universal testing machine (Instron 5966 equipped with a 10 kN load cell) was employed, and the measurements were carried out according to ASTM standard D1002. A minimum of 30 specimens per nanocomposite composition were tested. For thermogravimetric analysis (TA instruments TGA Q50), samples were heated to 800 °C at a rate of 10 °C/min under a nitrogen flow. To dry the CNC-only sample, the temperature was held at 100 °C for 5 minutes before completing the temperature ramp. A Thermo-VG Scientific ESCALab 250 with a monochromatic Al K $\alpha$  source (1486.6 eV) and a charge compensation gun were employed to perform X-ray photoelectron spectroscopy (XPS). All peak positions were calibrated against the C 1s standard (284.8 eV). Time-of-flight secondary ion mass spectroscopy (ION-TOF SIMS-5) was performed using a Bi<sup>3+</sup> ion as a primary beam with a charge compensation gun.

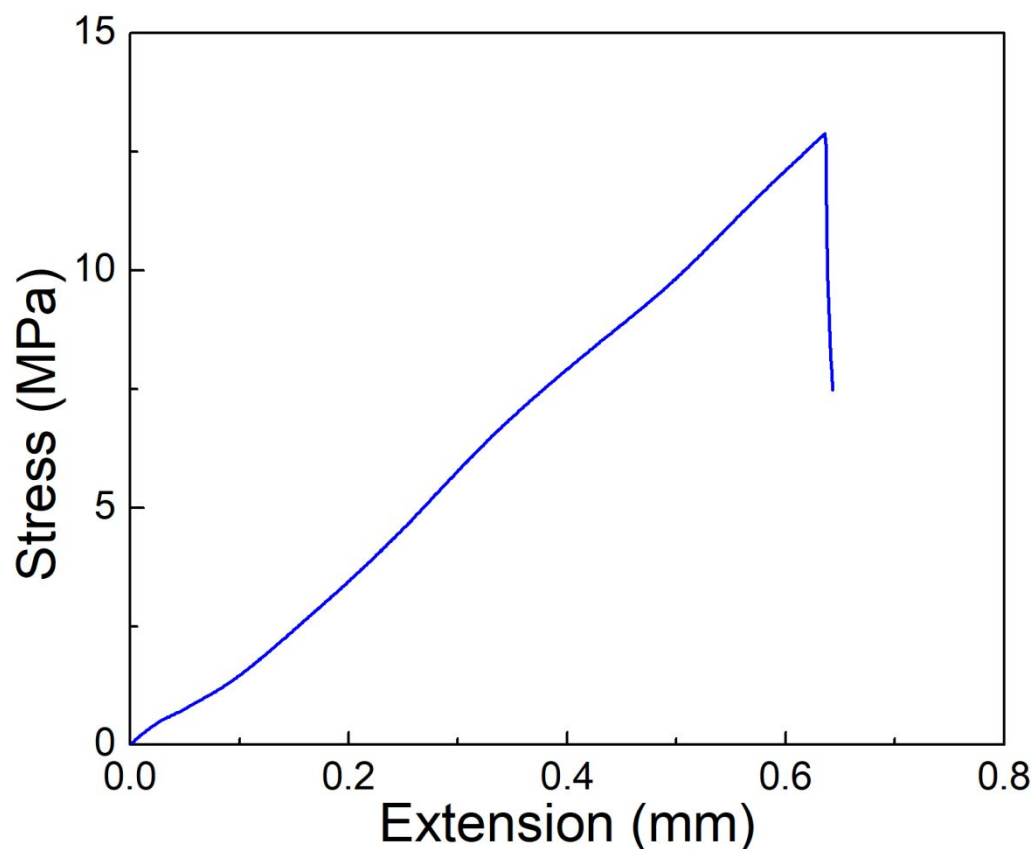

**Figure S1.** Typical stress-strain plot for as-cured BisF. The abrupt change near 0.6 mm extension corresponds to failure of the adhesive.

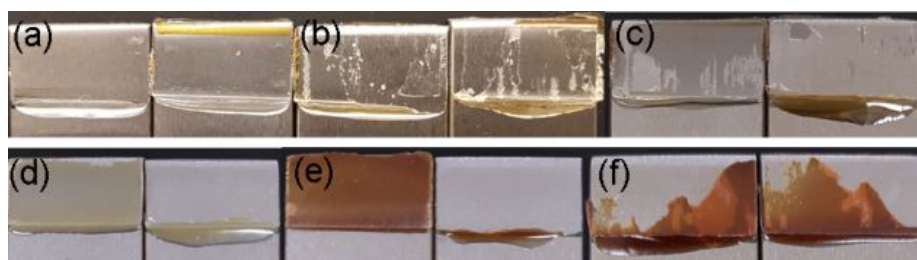

**Figure S2.** Photographs of metal specimens with adhesive residue following shear testing. The specimens were adhesively bonded with BisF (top, a-c) and BisF/CNC nanocomposites with 30 wt% CNC concentration (bottom, d-f). No thermal treatment was performed in (a, d). Thermal treatments were performed (b, e) at 180 °C and (c, f) at 200 °C.

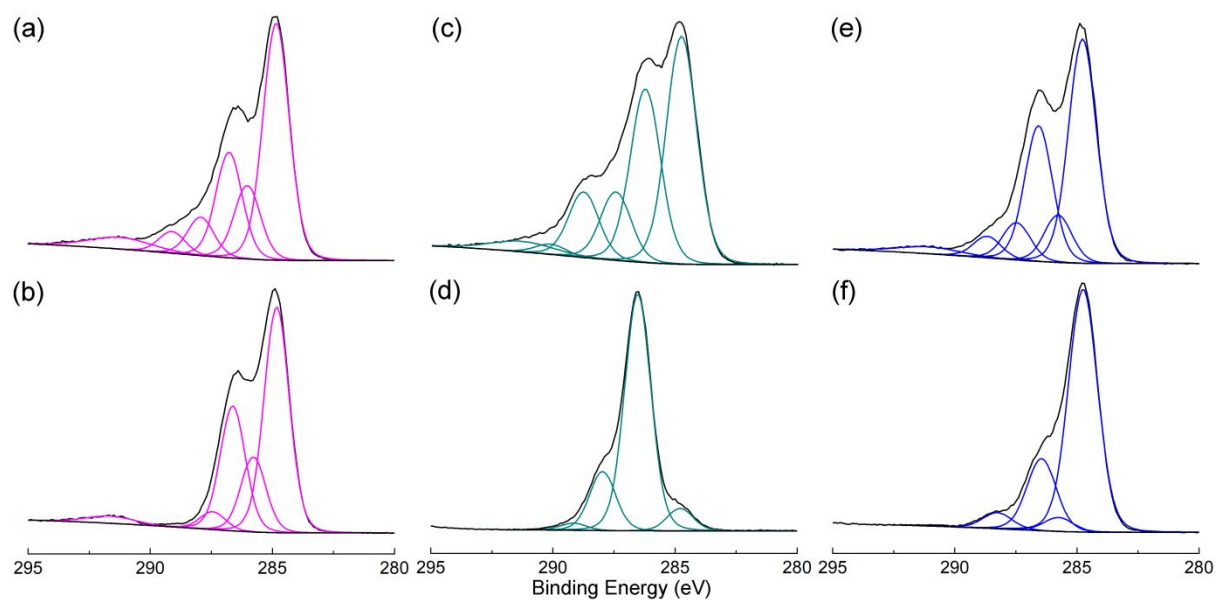

**Figure S3.** C 1s spectra of thermally-treated (top) and pristine (bottom) BisF (a,b), CNCs (c,d), and BisF/CNC with 30 wt% CNC concentration (e,f).

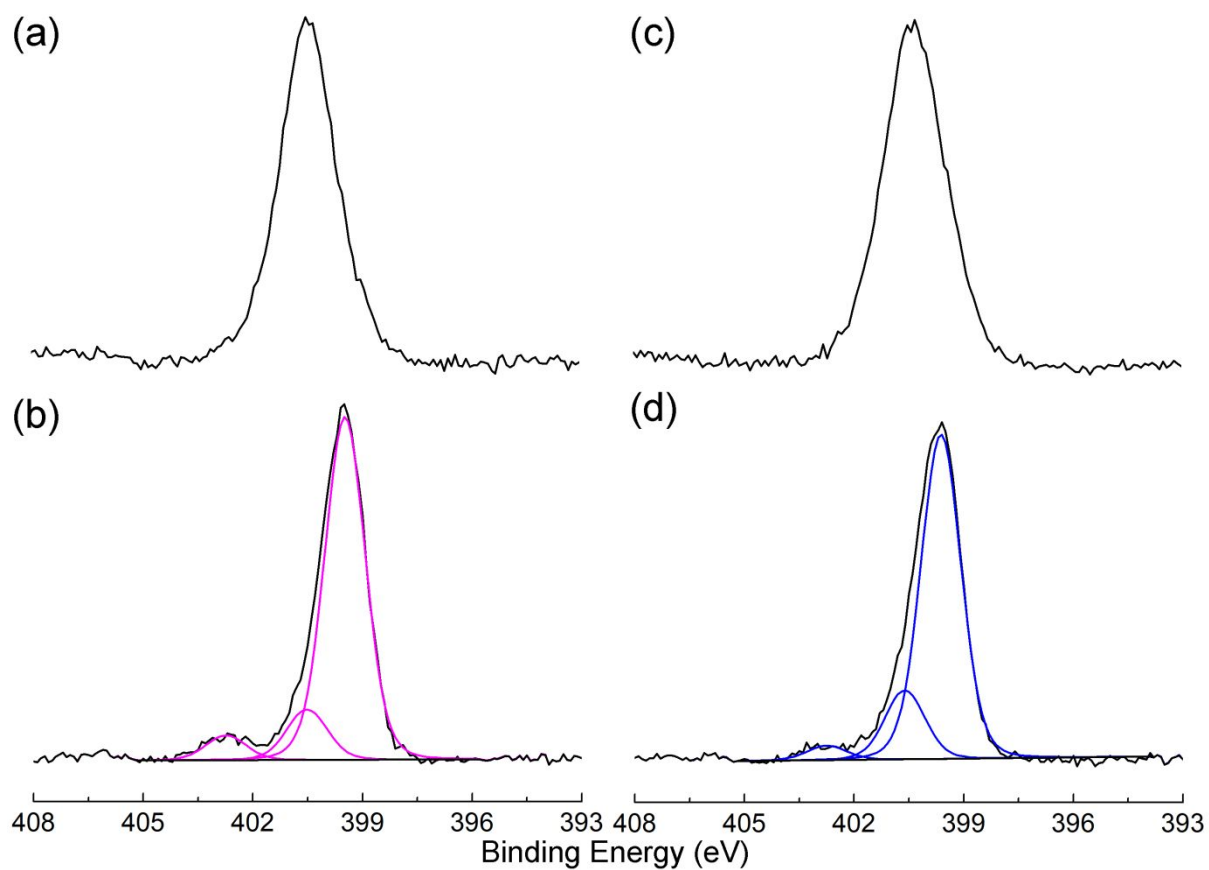

**Figure S4.** N 1s spectra of thermally-treated (top) and pristine (bottom) BisF (a,b) and BisF/CNC with 30 wt% CNC concentration (c,d).

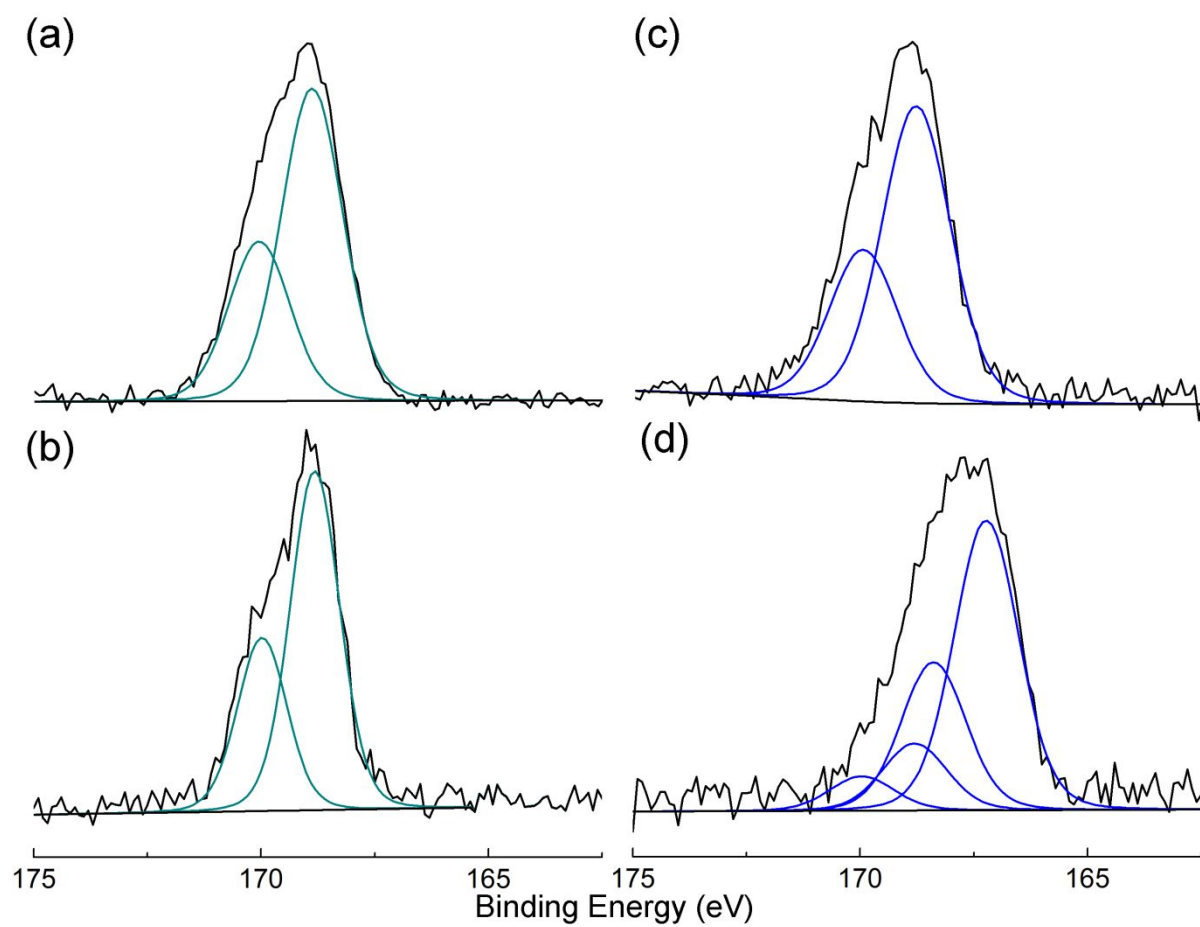

**Figure S5.** S 2p spectra of thermally-treated (top) and pristine (bottom) CNCs (a,b) and BisF/CNC with 30 wt% CNC concentration (c,d).
